# Supplementary material for: Rapid extraction and quantitative detection of the herbicide diuron in surface water by a hapten-functionalized carbon nanotubes based electrochemical analyzer
Source: Royal Society of Chemistry journal article supplement (doi:10.1039/c2an16235k), 2012-01-01

## Supporting Information

### Rapid extraction and quantitative detection of herbicide diuron in surface water by hapten-functionalised carbon nanotubes based electrochemical analyzer

Priyanka Sharma<sup>1</sup>, Vijayender Bhalla<sup>1</sup>, Satish Tuteja, Manil Kukkar and C. Raman Suri\*

#### Supporting Information T1

GC analysis was carried out by using column (30m long, 0.32mm I.D. and 0.25  $\mu\text{m}$ ) carrying a film 0.25 mm thick 100% methylphenyl polysiloxane (Rtx-50 Restek). The initial value of the current was kept at 1 nA throughout the analysis. The column was held at 100 °C initially for 1 min and then programmed to 180 °C at 35 °C per minute and shifted to 240 °C at 10 °C per min with a final hold at 240 °C for 5 min, and the temperature of the injector was kept at 250 °C. A constant volume of 1  $\mu\text{L}$  sample was injected through auto injector (Shimadzu AOC-20 i).

#### Figure legends

**Figure S1:** FTIR spectroscopy analysis of p-CNTs, c-CNTs, h-CNTs and the hapten demonstrating carboxyl group ( $>\text{C}=\text{O}$ ) stretching on CNTs by giving a strong peak at 1716  $\text{cm}^{-1}$  and a weak  $-\text{CH}$  stretching at 2850  $\text{cm}^{-1}$

**Figure S2:** SEM micrograph of multiwalled CNTs on the surface of SPE. The scan was recorded at 25.0 KV.

**Figure S3:** Confocal microrgraphs (a) bare electrode (b) bio-functionalised electrode at 20X magnification. RITC labeled anti-diuron antibodies were used in confocal studies on antigen (diuron derivative) coated SPE. A uniform coverage of antibody on CNT functionalised SPE

surface. The pixel data of micrographs confirmed high fluorescence intensity (~200) over the whole scan area on CNTs functionalised SPE.

Figure S1

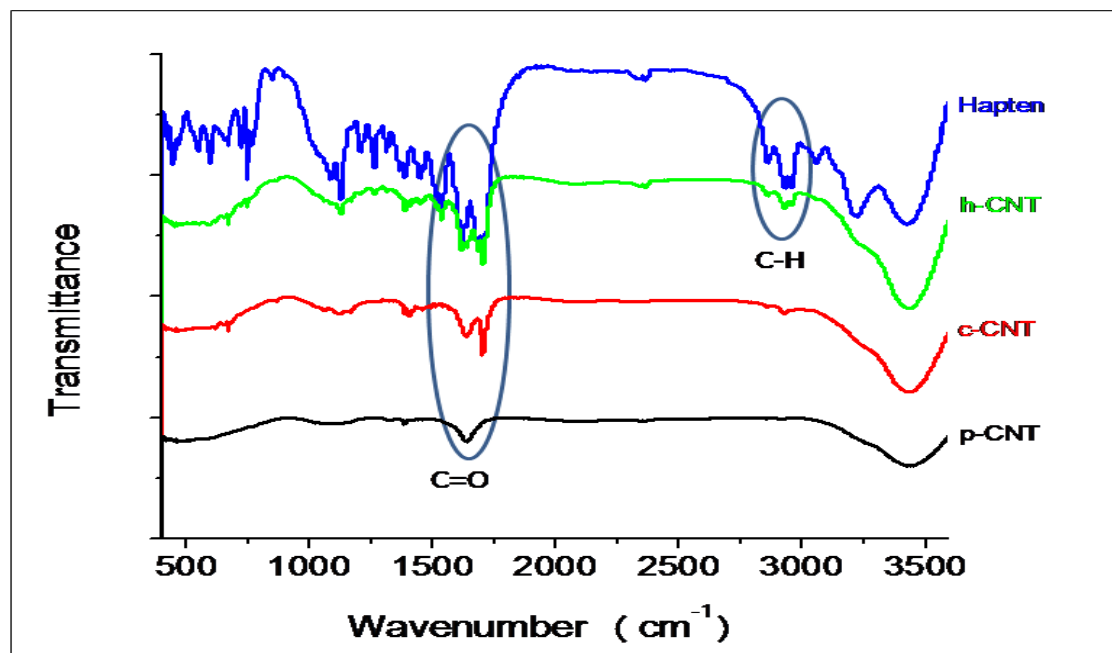

**Figure S2**

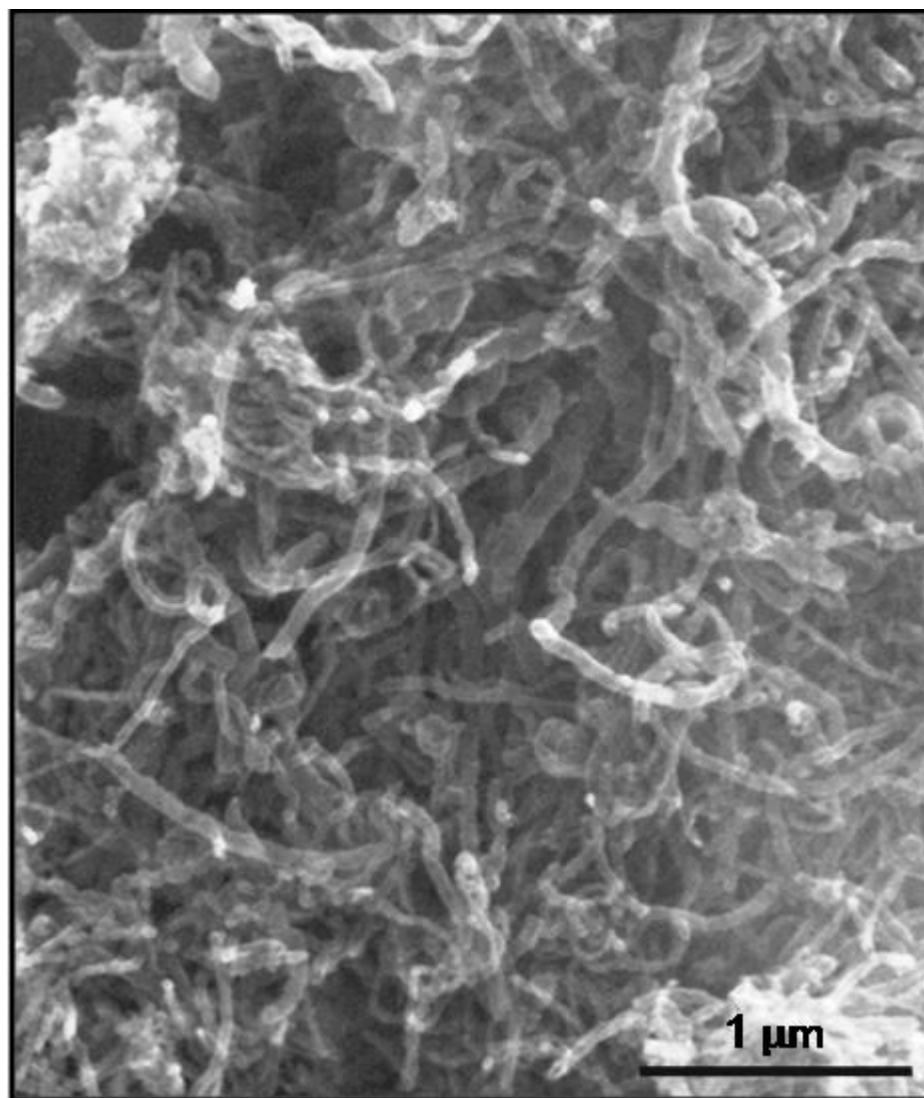

**Figure S3**

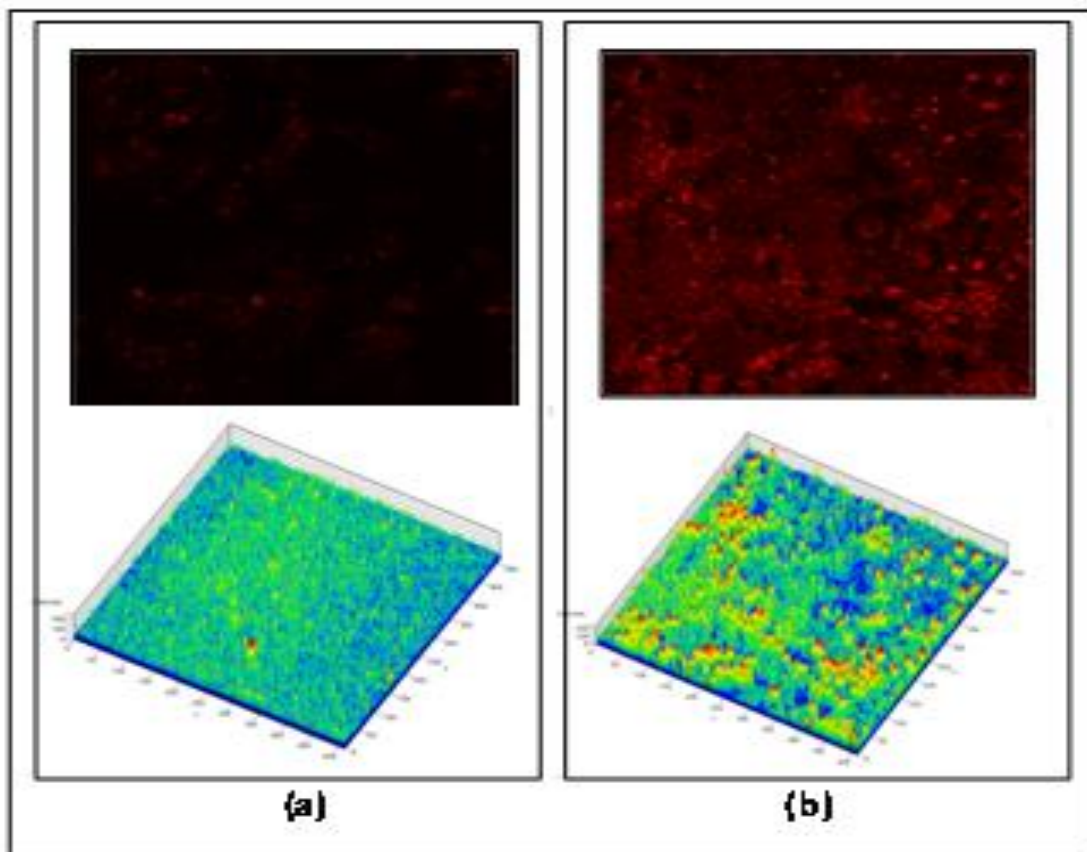

Supplement: c2an16235k.pdf [file c2an16235k.pdf]
